# Supplementary material for: Small-Scale Spatial Analysis ofIn SituSea Temperature throughout a Single Coral Patch Reef
Source: Hindawi journal article supplement (doi:10.1155/2011/719580), 2010-10-28

Table 1S – Degree of correlation of depth with biotic and abiotic factors and diversity. Bolded values are considered significant.

| Test                                                  | Coefficient   |               | Corrected |          |
|-------------------------------------------------------|---------------|---------------|-----------|----------|
|                                                       | Pearson's     | Spearman's    | df        | <i>P</i> |
| Relative Water Flow                                   | <b>-0.837</b> | <b>-0.912</b> | 9.789     | < 0.001  |
| All coral combined                                    | <b>-0.548</b> | <b>-0.402</b> | 24.951    | 0.003    |
| <i>Porites compressa</i> (PCO)                        | <b>-0.625</b> | <b>-0.550</b> | 19.561    | 0.002    |
| <i>Montipora</i> sp. (MSP)                            | 0.168         | 0.316         | 49.622    | 0.237    |
| <i>Pocillopora damicornis</i> (PDA)                   | -0.164        | -0.303        | 58.867    | 0.207    |
| Other coral (OCOR)                                    | -0.086        | 0.027         | 56.913    | 0.519    |
| All macroalgae combined                               | <b>-0.344</b> | <b>-0.416</b> | 29.825    | 0.055    |
| <i>Dictyosphaeria</i> sp. (DSP)                       | -0.120        | -0.132        | 72.709    | 0.306    |
| <i>Eucheuma</i> sp. and <i>Kappaphycus</i> sp. (EKSP) | <b>-0.308</b> | <b>-0.532</b> | 29.580    | 0.089    |
| Other Macroalgae                                      | -0.068        | -0.213        | 87.026    | 0.526    |
| All abiotic substrates combined                       | <b>0.621</b>  | <b>0.481</b>  | 23.953    | < 0.001  |
| Dead coral with algae (DCA)                           | -0.189        | -0.189        | 54.562    | 0.161    |
| Recently dead coral (RDC)                             | -0.097        | 0.223         | 84.304    | 0.373    |
| Rubble (RUB)                                          | <b>0.564</b>  | <b>0.524</b>  | 33.448    | < 0.001  |
| Sand (SAN)                                            | <b>0.744</b>  | <b>0.690</b>  | 15.917    | < 0.001  |
| Other invertebrates (OINV)                            | <b>0.448</b>  | <b>0.346</b>  | 30.101    | 0.010    |
| Unknown (UNK)                                         | -0.127        | -0.031        | 54.259    | 0.350    |
| Shannon Diversity Index                               | <b>-0.280</b> | <b>-0.225</b> | 32.998    | 0.103    |

Table 2S – Percent of the variance by environmental variables (i.e., depth and/or substrate), location, and shared (environmental variables and location) in the regression of; (1) temperature on depth, (2) temperature on location, (3) temperature on depth and location, (4) temperature on substrate and depth, and (5) temperature on substrate, depth, and location. Dominant factors are bolded.

| Index                 | Data Set  |      |             |      |                     |      |             |      |             |      |
|-----------------------|-----------|------|-------------|------|---------------------|------|-------------|------|-------------|------|
|                       | Two Years |      | Summer 2008 |      | Summer 2009         |      | Winter 2008 |      | Winter 2009 |      |
| Relative Hotspots     | location  | 19.1 | location    | 13.1 | location            | 29.5 | location    | 35.4 | location    | 15.7 |
| Relative Coldspots    | depth     | 2.1  | depth       | 5.4  | location            | 28.9 | location    | 39.9 | location    | 17.4 |
|                       | location  | 29.6 | location    | 38.2 |                     |      |             |      |             |      |
| Relative Hothours     | shared    | 6.6  | shared      | 0.0  | location            | 30.9 | location    | 48.9 | location    | 9.3  |
|                       | location  | 28.1 | location    | 33.9 |                     |      |             |      |             |      |
| Relative Coldhours    | depth     | 24.1 | depth       | 23.1 | depth               | 9.7  | depth       | 19.2 | depth       | 20.5 |
|                       | location  | 4.6  | location    | 15.2 | location            | 17.9 | location    | 5.8  | location    | 6.7  |
|                       | shared    | 61.9 | shared      | 39.4 | shared              | 49.6 | shared      | 57.2 | shared      | 49.1 |
| Overall Average       | NA        |      | depth       | 7.1  | depth               | 2.3  | location    | 39.7 | location    | 17.5 |
|                       |           |      | location    | 17.0 | location            | 34.9 |             |      |             |      |
| Average Daily Minimum | NA        |      | shared      | 7.2  | shared              | 1.9  | location    | 24.6 | depth       | 4.1  |
|                       |           |      | location    | 25.9 | location            | 36.4 |             |      | location    | 19.6 |
| Average Daily Maximum | NA        |      | depth       | 21.4 | depth               | 8.7  | depth       | 11.3 | depth       | 21.5 |
|                       |           |      | location    | 10.1 | location            | 25.4 | location    | 33.4 | depth       | 75.5 |
|                       |           |      | shared      | 15.7 | shared              | 15.1 | shared      | 19.2 |             |      |
| Average Daily Range   | NA        |      | depth       | 24.0 | substrate and depth | 68.9 | depth       | 19.4 | depth       | 75.5 |
|                       |           |      | location    | 9.7  |                     |      | location    | 9.9  |             |      |
| Total Heating Hours   | NA        |      | shared      | 29.7 | substrate and depth | 25.9 | NA          | NA   |             |      |
|                       |           |      | depth       | 14.3 |                     |      |             |      |             |      |
|                       |           |      | location    | 15.4 |                     |      |             |      |             |      |
|                       |           |      | shared      | 15.8 | location            | 21.2 |             |      |             |      |
|                       |           |      |             |      | shared              | 21.0 |             |      |             |      |

## Supplemental Figure Legends

Figure 1S – Fourier transform scaled periodogram of the standard deviation in temperature for the two years of data. Principal frequencies are marked with vertical, dashed lines and correspond to seasonal (365 days), lunar (O1, 24.83 hours), solar (P1, 24 hours), lunar semi-diurnal (M2, 12.42 hours), and solar semi-diurnal (S2, 12 hours). Other peaks between 0.1 and 0.2 cycles per hour are likely echoes of O1 and P1. Scale bar in the upper right corner is the 95% confidence limit.

Figure 2S – Ordinary kriging interpolation of the proportion of two-year data set that were Coldhours (A) and the average daily temperature range for Winter 2008 (B).

Figure 3S – Tukey boxplots of the seasonal and annual variation seen in average daily minimum (A) and maximum (B) temperatures. The rectangle represents the interquartile range (i.e., the 25<sup>th</sup> percentile, median, and 75<sup>th</sup> percentile), the “whiskers” represent all values that are within 1.5 times the interquartile range, and the open circles represent outliers, defined as data points that lie outside the whiskers.

Figure 4S – Tukey boxplots of the seasonal and annual variation in percent of time sites spent as Hothours (A) and Coldhours (B). The rectangle represents the interquartile range (i.e., the 25<sup>th</sup> percentile, median, and 75<sup>th</sup> percentile), the “whiskers” represent all values that are within 1.5 times the interquartile range, and the open circles represent outliers, defined as data points that lie outside the whiskers.

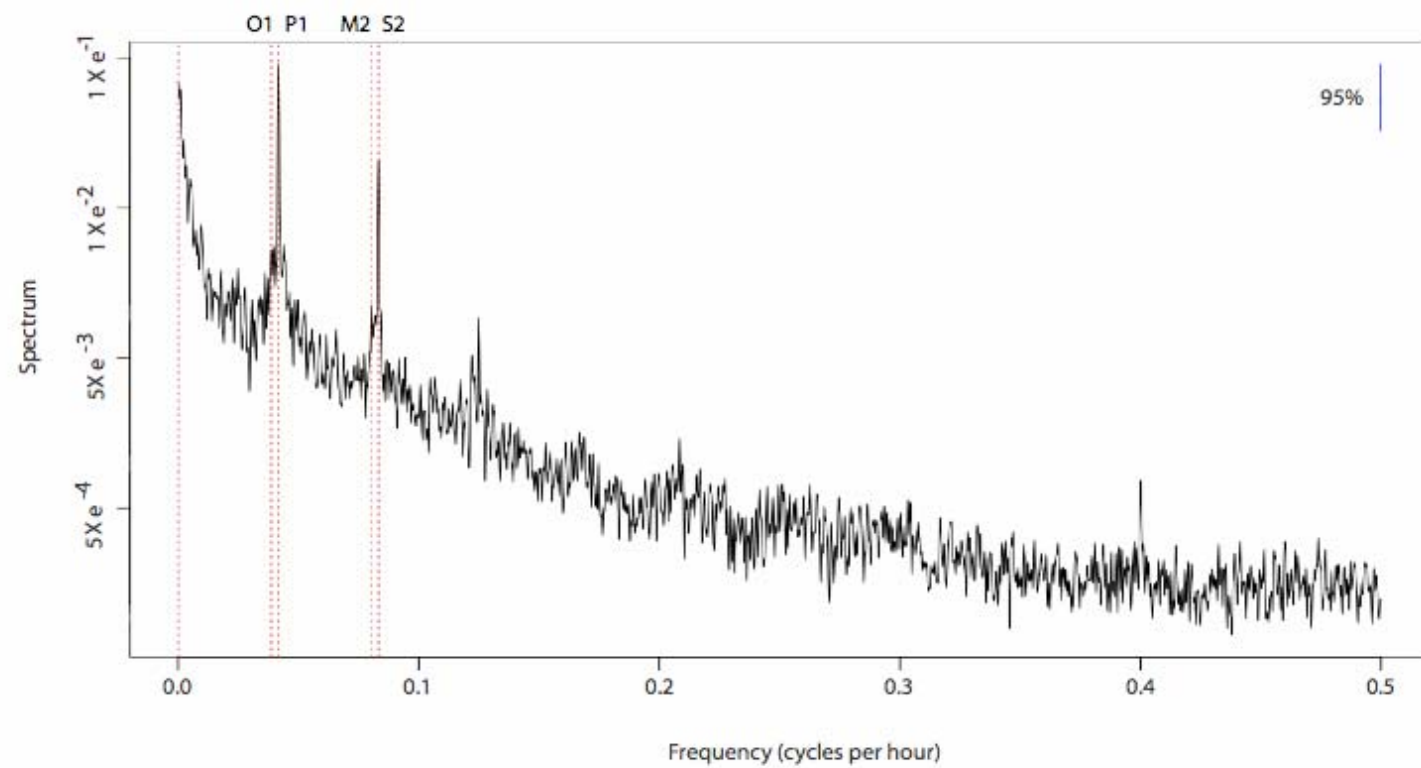

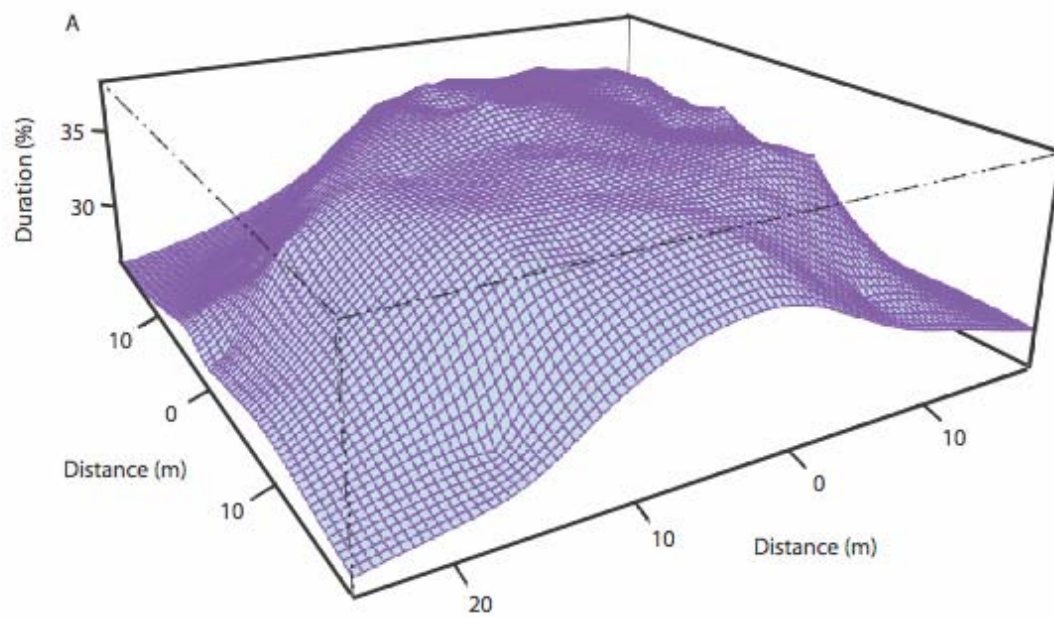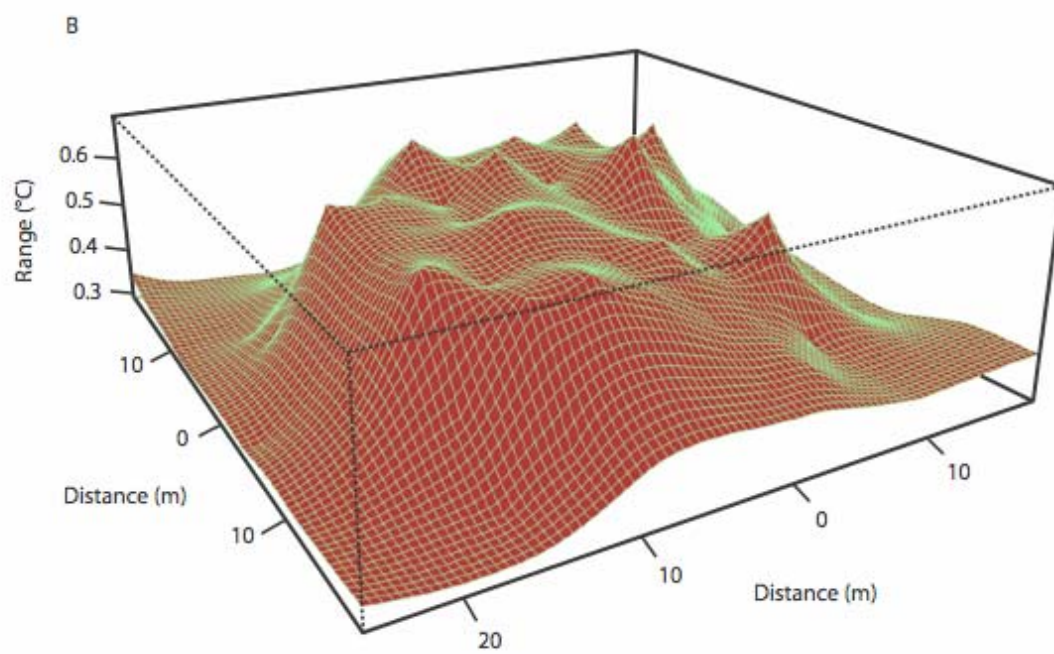

A

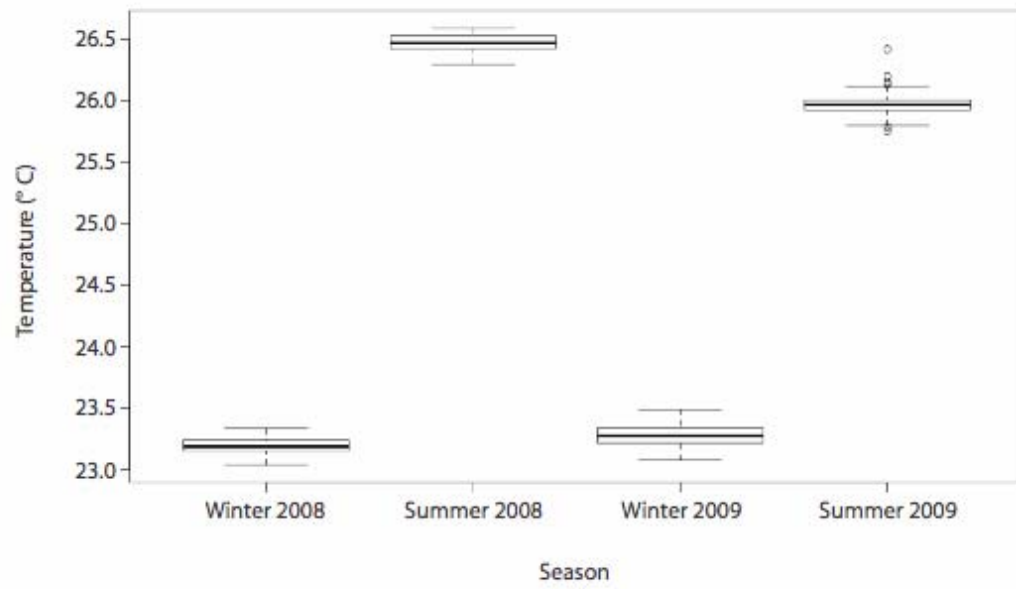

B

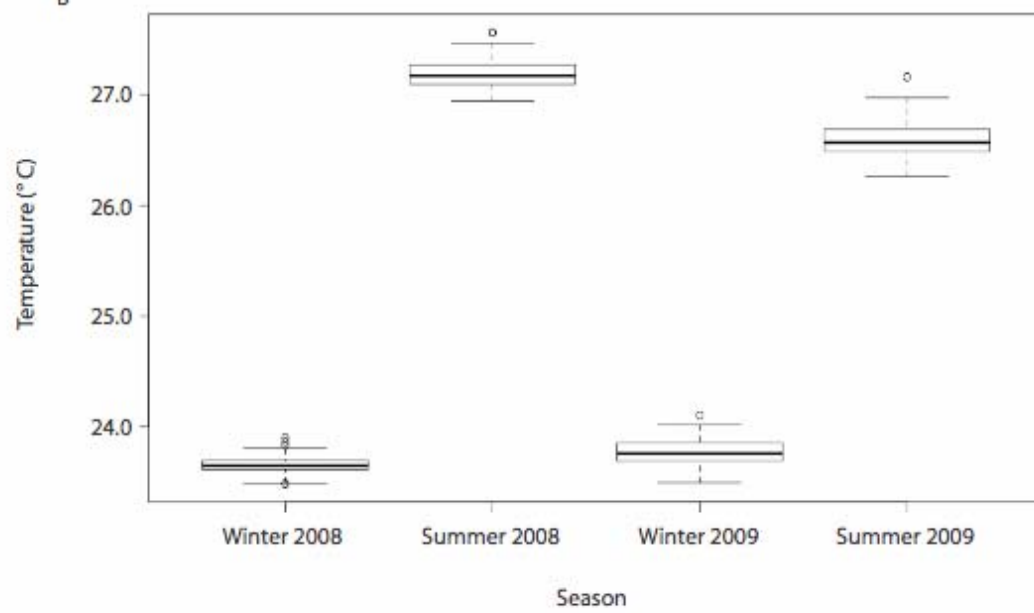

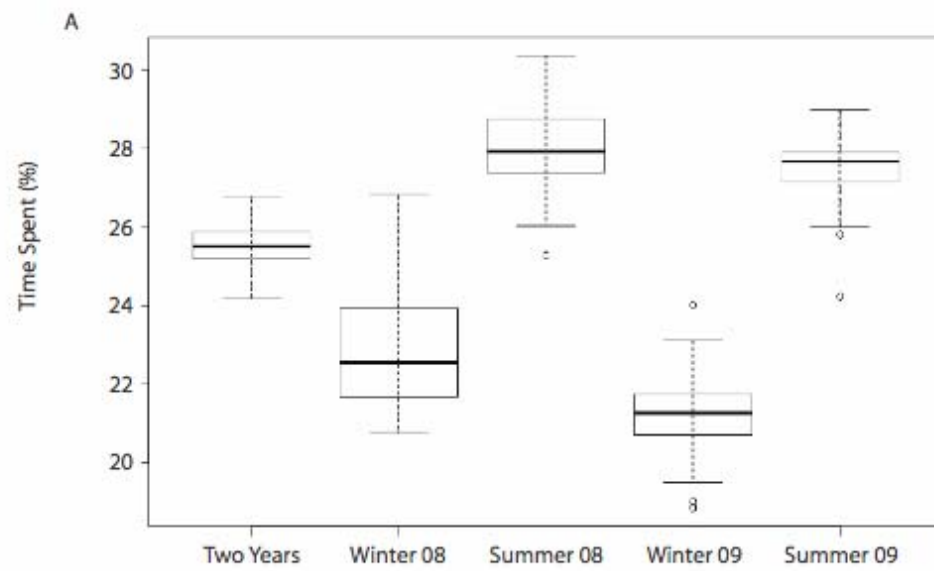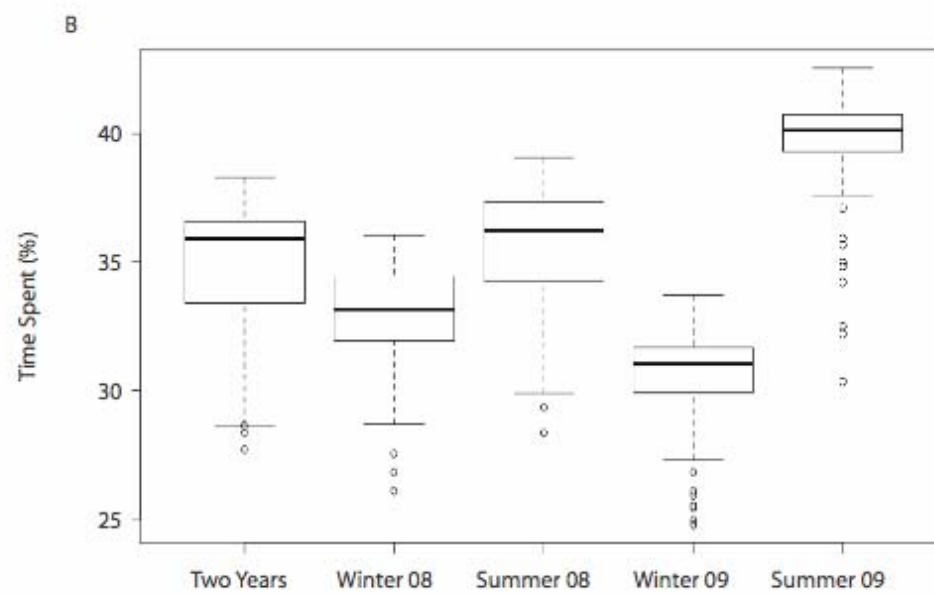

Supplement: f1 [file 719580.f1.pdf]
